# Supplementary material for: Near-infrared-triggered in situ hybrid hydrogel system for synergistic cancer therapy
Source: Royal Society of Chemistry journal article supplement (doi:10.1039/c5tb00904a), 2015-01-01
Supplement: c5tb00904a1.pdf [file c5tb00904a1.pdf]

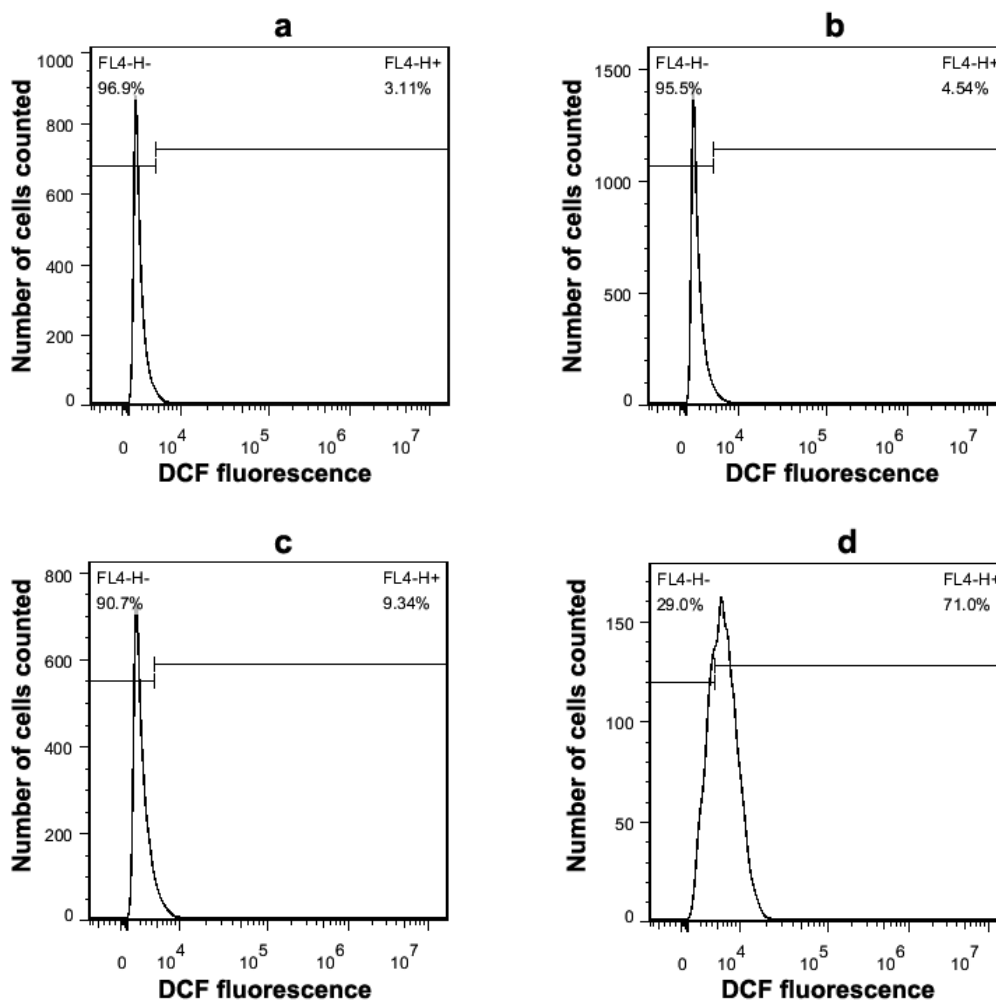

Fig. S1. Intracellular ROS quantitative determination of a) blank cells, b) blank cells with 808nm laser irradiation, c) TiO<sub>2</sub>@MWCNTs and d) TiO<sub>2</sub>@MWCNTs with 808nm laser irradiation.

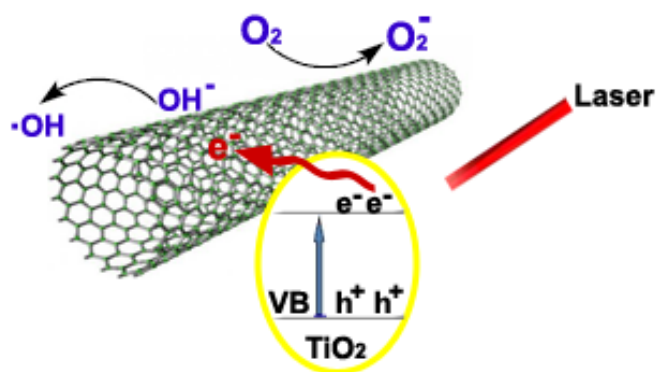

Fig. S2. Schematic illustration of charge-transfer and ROS production process in TiO<sub>2</sub>@MWCNTs nanocomposites with laser irradiation.

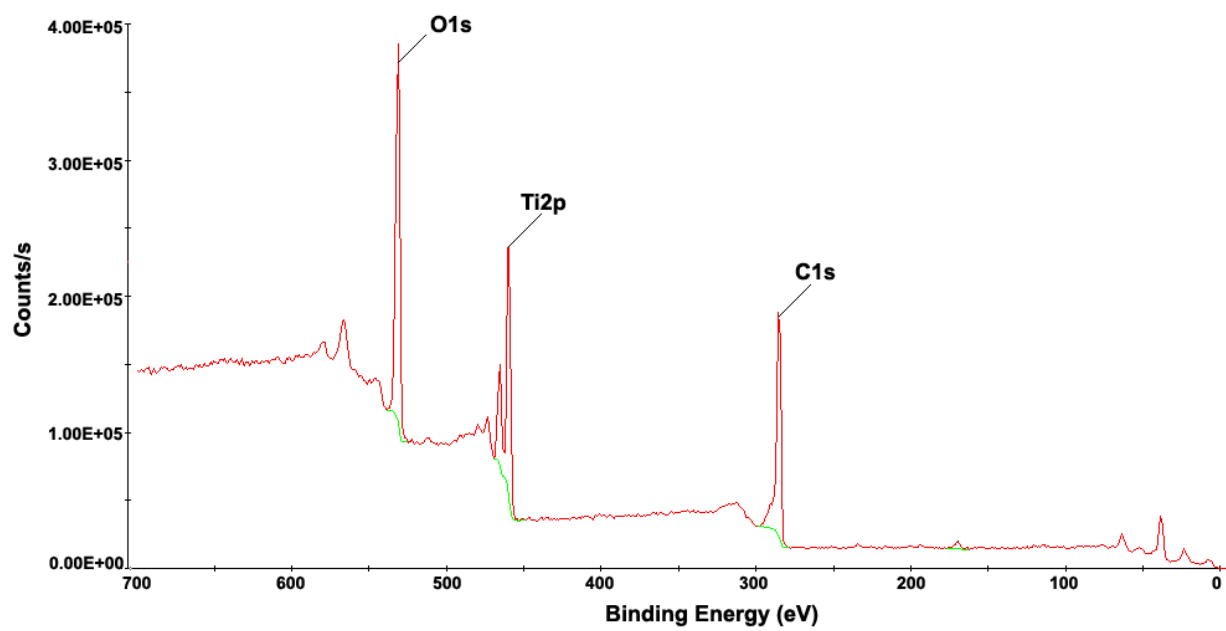

Fig. S3. XPS spectra of TiO<sub>2</sub>@MWCNTs nanocomposites.

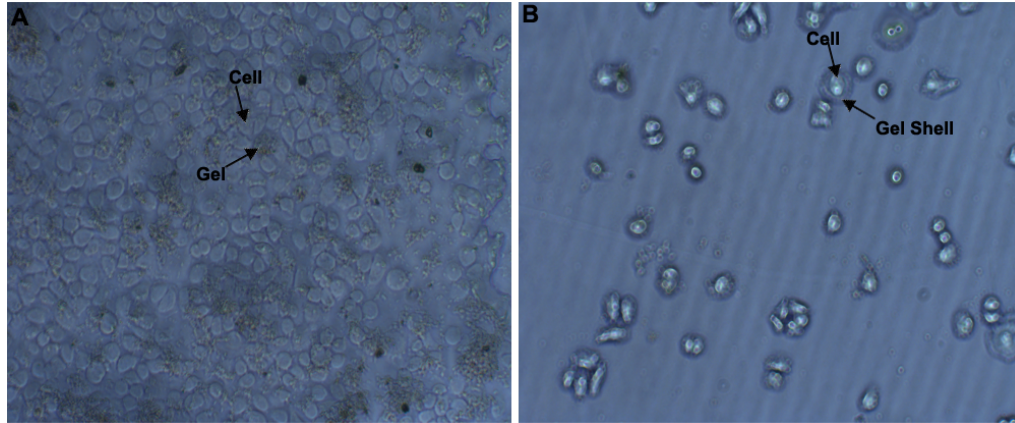

Fig. S4. Images of the location about the hydrogel formed inside or outside cancer cells recorded by the microscope (200x): A) the image recorded at 1h after the hydrogel formed; B) the image recorded at 72h after the hydrogel formed.

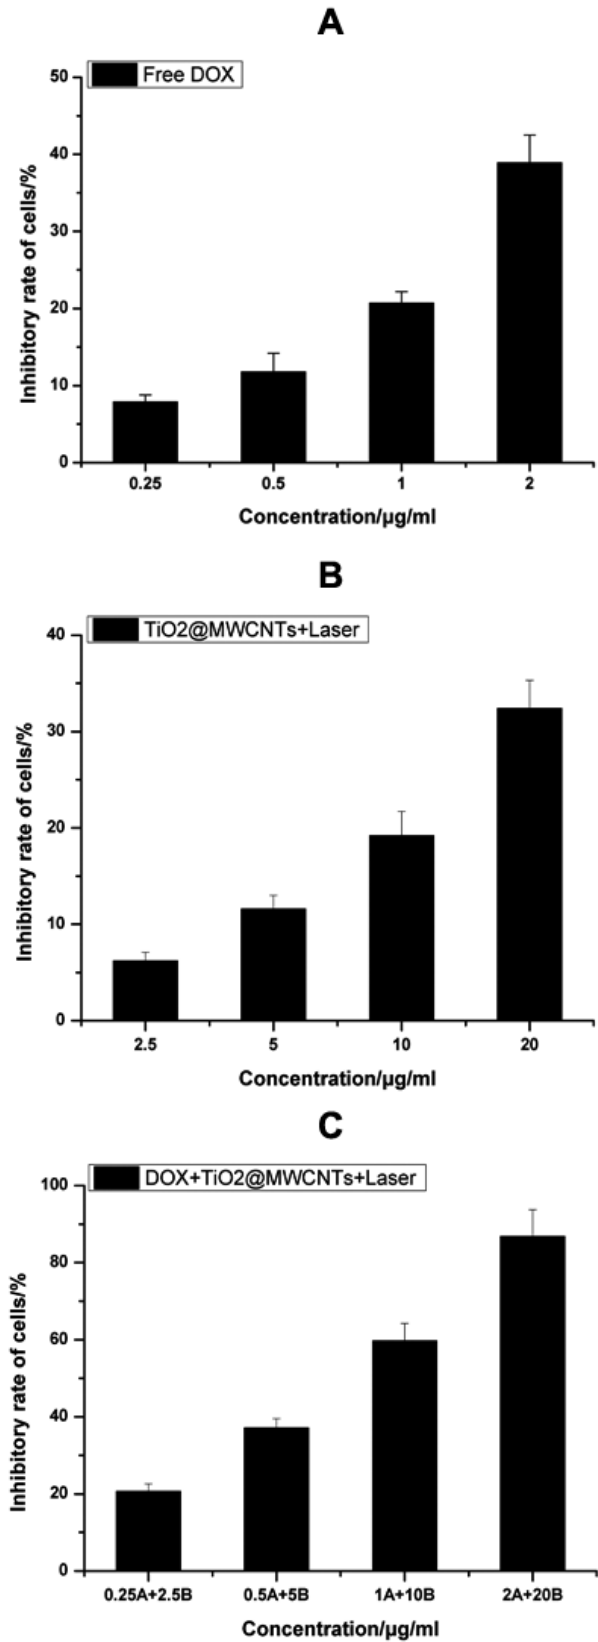

Fig. S5. The DOX and TiO<sub>2</sub>@MWCNTs combination studies at 24h. Note: ata are presented as mean  $\pm$  standard deviation (n = 6).
